# Supplementary material for: Evaluation of Serum Kidney Injury Markers FABP1, NGAL, Cystatin C and the Inflammatory Cytokine IL-18 in the Detection of Acute-on-Chronic Liver Failure (ACLF) Associated Acute Kidney Injury (AKI)
Source: Research Square preprint supplement (doi:10.21203/rs.3.rs-2186737/v1), 2022-10-21
Supplement: Supplementary file 1 [file 2358da1e60ce074e3a4bfb05.xlsx]

## Sheet: Sheet1
Marker/Analyte	source	ethnicity	study group	Number of patients	measurement	Outcome	sensitivity specificity	References
Cystatin C	serum	CANONIC multicentre	ACLF and CLD AD	CLD (n=429) ACLF (n=176)	Beckman Coulter autoanalyser	Progression to ACLF	CysC cutoff = 1.5 mg/L was found to predict 90-day mortality with 73.3% sensitivity and 52.5% specificity.	15
Cystatin C	serum	Indian	ACLF with no AKI and progression	ACLF (n=47 )	Nephelometry	Early onset AKI	CysC cut off =1.47 mg/L was found to predict early onset AKI with a sensitivity of 0.94 and specificity of 0.68. The cystatin C ((area under the curve [AUC]=0.853)	16
Cystatin C	serum	Chinese	HBV ACLF	ACLF (n=72 )	Particle-enhanced immunonephelometry assay	Progression to AKI	Cys C cut off = 1.21mg/ml. odds ratio = 1.8; 95%CI: 1.4-2.3, P = 0.021 (100% sensitivity, 87.5% specificity)	17
Cystatin C	serum	Chinese	HBV ACLF	ACLF (n=123)	Immunonephelometry assay.	Mortality	Sensitivity and specificity for predicting 3-months mortality were 91% and 89%, respectively, with a threshold value of 3.91.	18
Cystatin C	plasma	Thailand	HBV ACLF vs CLD-AD w/o AKI, survivor vs non-survivor	Decompensated CLD (CLD-AD) (n=46 )	Nephelometer	ACLF vs dCLD and 90- day mortality	CysC level ≥ 1.25 mg / L was significantly associated with 90-day mortality. The CysC cut-off level ≥ 1.25 mg / L provided 80% sensitivity and 75% specificity for predicting 90-day mortality	19
FABP1 + IL18 + NGAL + Cystatin C	urine	Chinese	HBV ACLF and HBV DC	HBV-ACLF (n=71) and HBV-DC (n=28 )	ELISA	AKI in HBV ACLF and AKI in HBV CLD	AUROC is not performed	20
FABP1 + IL18 +NGAL + KIM 1	urine	TRIBE AKI consortium	Cirrhosis with or without AKI	Liver cirrhosis (n=188)	ELISA	Progression to AKI with mortality vs withour mortality	IL-18 (relative risk [RR], 4.09; 95% confidence interval [95% CI], 1.56 to 10.70), KIM-1 (RR, 3.13; 95% CI, 1.20 to 8.17), L-FABP (RR, 3.43; 95% CI, 1.54 to 7.64)	22
FABP1 + IL18 +NGAL + KIM 1 +Cystatin C	urine + serum	Chinese	Advanced cirrhosis patients	Liver cirrhosis (n=43)	ELISA	HRS vs non-HRS in advanced cirrhosis	The cut-off values for NGAL and KIM-1 to predict HRS were 18.72 ng/mL and 1.499ng/mL respectively (AUCs 0.84, p=0.005; and 0.78, p=0.008).	21
IL18 (+cytokine profile)	serum	Turkish	HBV and HCV	CHB (n=25), CHC (n=25), and the control group (n=30)	ELISA	HBV and HCV progression vs controls	IL18 in HCV groups was significantly higher than that of control (p-value 0.004)	23
NGAL	urine	Spanish	ACLF and CLD AD	Acute Kidney Injury (AKI) (n=39), CLD-AD without AKI (n=16), ACLF (n=34)	Bio-Plex Pro RBM Human Kidney Toxicity panel	ACLF and no ACLF, and progression to AKI	AUROC of NGAL in discriminating ACLF and No ACLF is 0.878	24
NGAL + Cystatin C	serum	Chinese	HBV ACLF	HBV ACLF (n=54)	ELISA	Survivor vs non-survivor	Serum NGAL level at baseline (low risk: <217.11 ng/mL and high risk: ≥ 217.11 ng/mL). The 90-day mortality rate was 22.73% (5/22) in the low-risk group and 71.88% (23/32) in the high-risk group.	25
